# Supplementary material
Source: PubMed Central journal article supplement (PMC5435421)
Supplement: supp_tpc.16.00573_TPC2016-00573-RAR1_Supplemental_Data_pdf_Figures_and_Tables_.pdf [file supp_tpc.16.00573_TPC2016-00573-RAR1_Supplemental_Data_pdf_Figures_and_Tables_.pdf]

**A**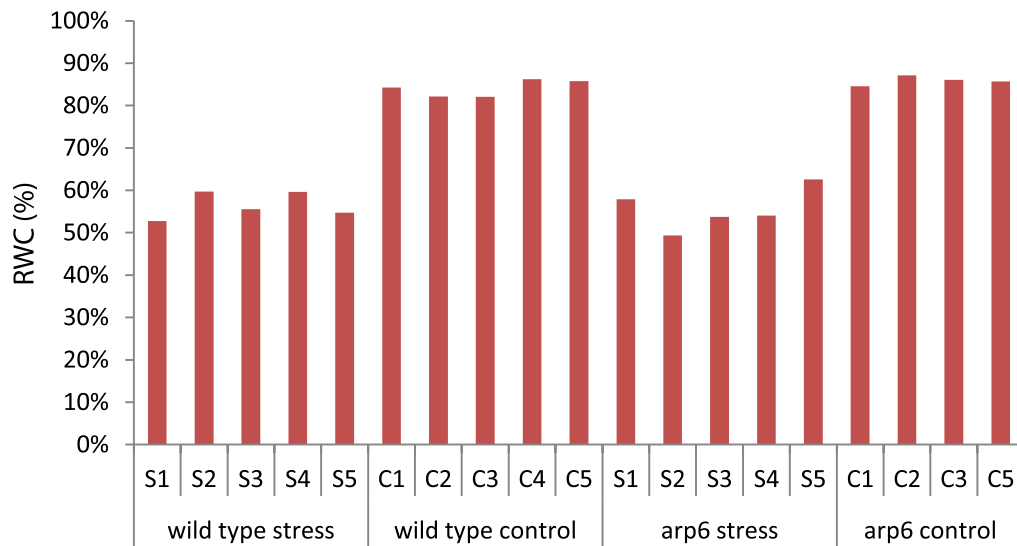**B**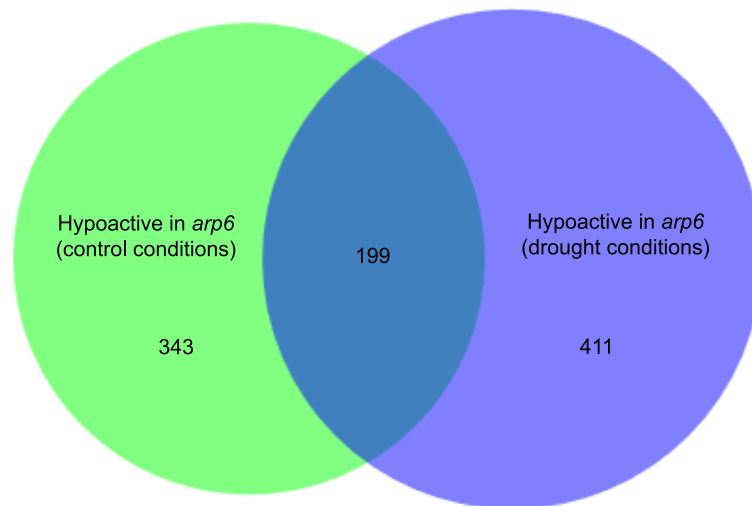**C**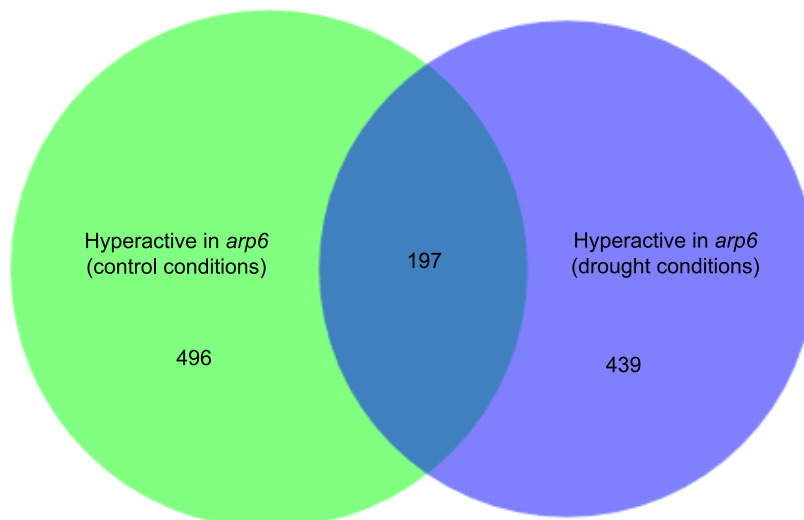

**Supplemental Fig. 1. A)** Comparison of the RWC for control plants and plants subjected to drought stress in wild-type and *arp6* plants used for RNA-seq and ChIP-seq analysis. **B)** Venn diagram showing genes hypoactive in *arp6* mutant in control and drought stress conditions. **C)** The same as in (B), but for genes hyperactive in *arp6* mutant.

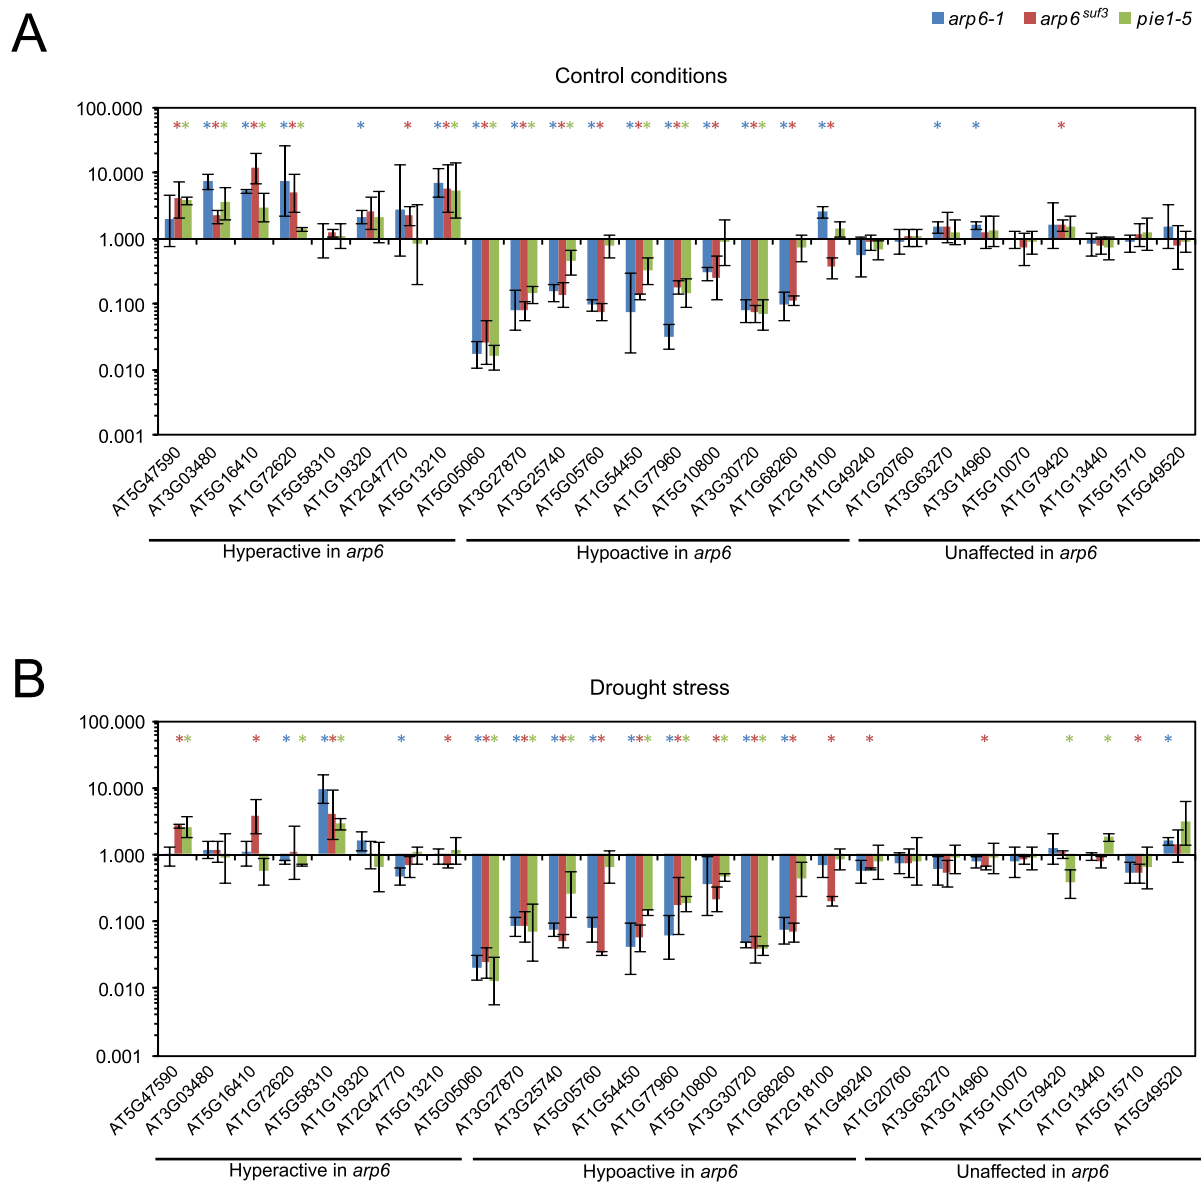

**Supplemental Fig. 2.** Different SWR1C mutants exhibit similar changes in transcription when compared to wild-type plants. **(A-B)** Expression level of selected genes which were hyperactive, hypoactive or unaffected in *arp6* according to RNA-seq results, measured by RT-qPCR in *arp6-1*, *arp6<sup>suf3</sup>*, and *pie-1* mutant background as fold change relative to wt. Analysis was performed in control conditions **(A)** and drought stress **(B)**. Significantly different expression relative to wt is indicated as a star above each data point (color of stars correspond to color of the data series). Error bars represent SD of independent biological repeats.

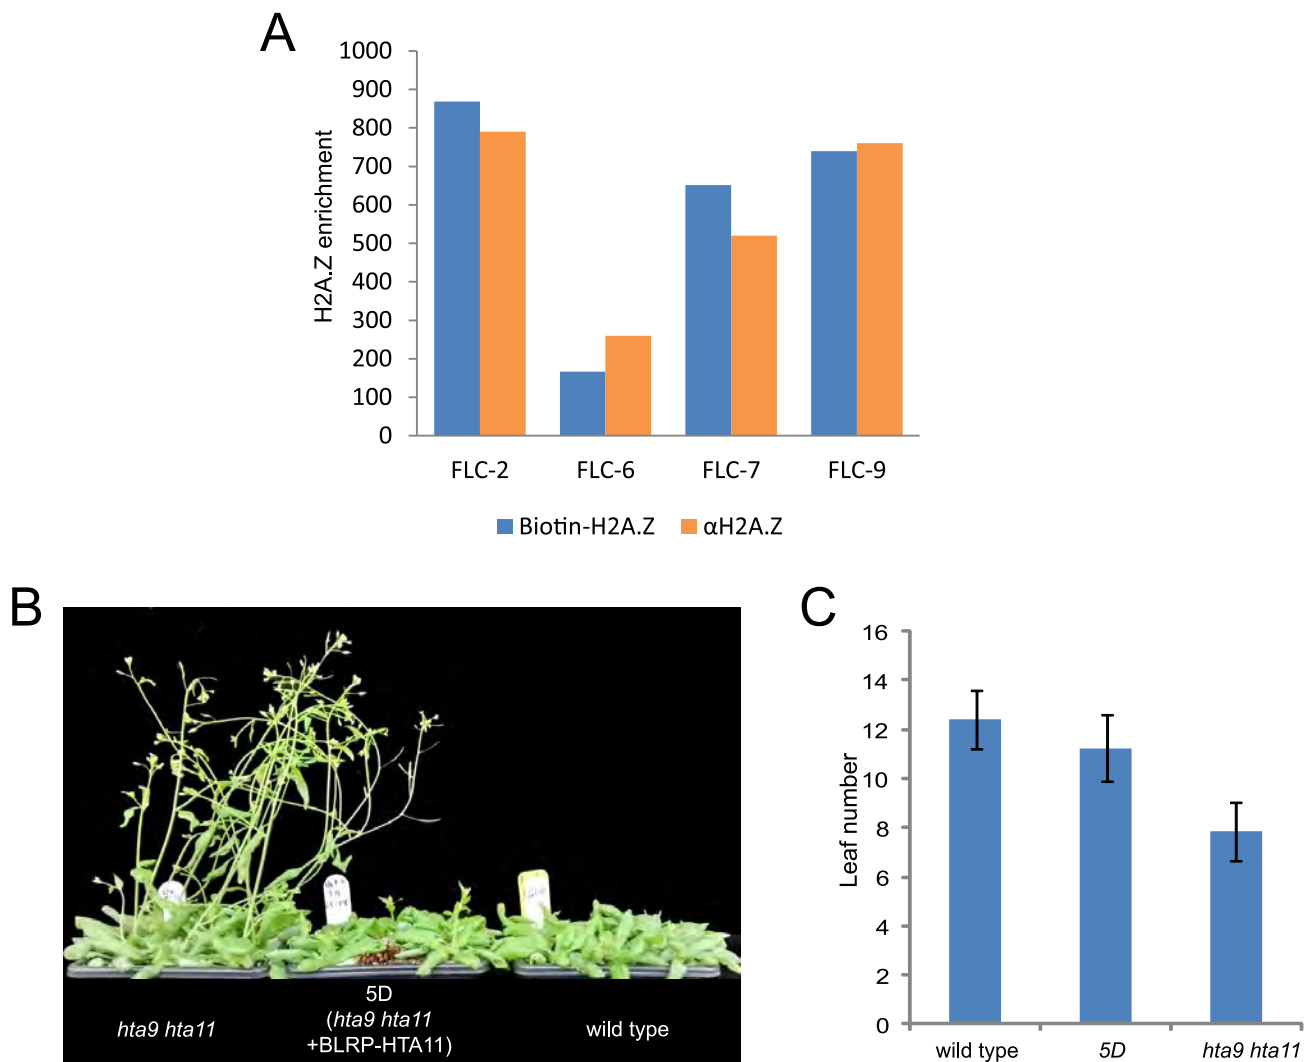

**Supplemental Fig. 3.** H2A.Z-tagged lines exhibit similar nucleosomal H2A.Z levels on the *FLC* gene and complement *hta9 hta11* mutations. **A)** Comparison of H2A.Z enrichment on the *FLC* gene for H2A.Z-tagged line 5D with endogenous H2A.Z at the locus (ChIP using  $\alpha$ H2A.Z) based on the results described in Deal et al. (2007). The graph show average enrichment as measured by ChIP and quantitative PCR (delta delta Ct method). As the two datasets had different scales, the arbitrary units were used to simplify comparison. The line 5D was further used for the genome-wide ChAP-seq study. **B)** Early-flowering phenotype of *hta9 hta11* double mutant line is abolished by expression of HTA11-tagged construct used in the ChAP study. **C)** Rosette leaf number at the bolting time in wild type ( $n=27$ ), *hta9 hta11* mutant ( $n=29$ ), and the complemented mutant line 5D ( $n=30$ ) as measured in LD conditions. Error bars show SD.

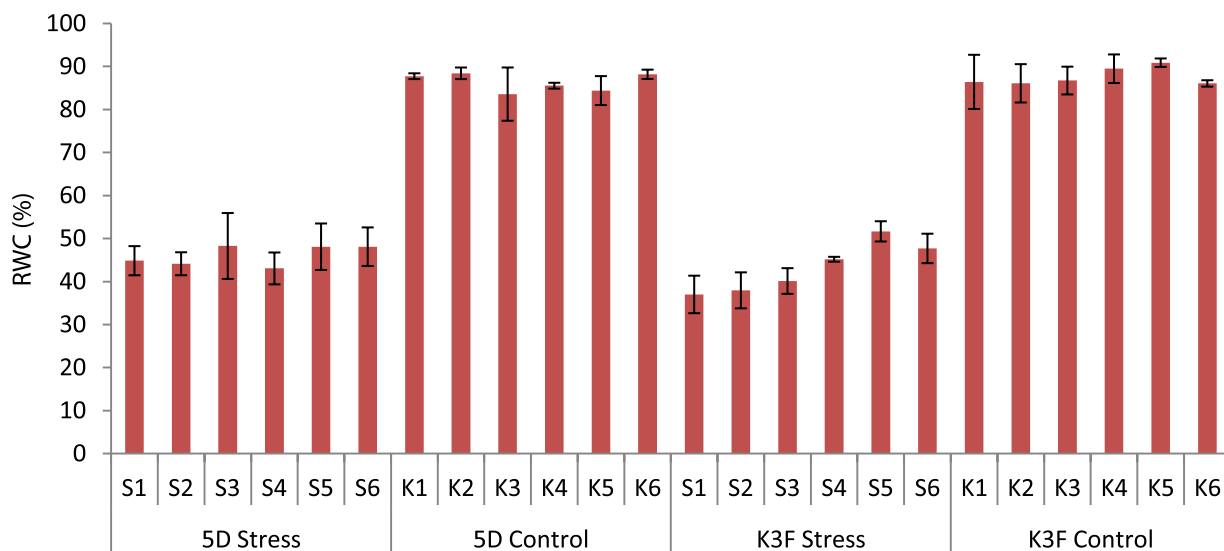

**Supplemental Fig. 4.** Comparison of the RWC for H2A.Z-tagged line 5D and lined K3F transformed with an empty vector in control and drought stress conditions. Error bars represent standard deviations from three technical replicates.

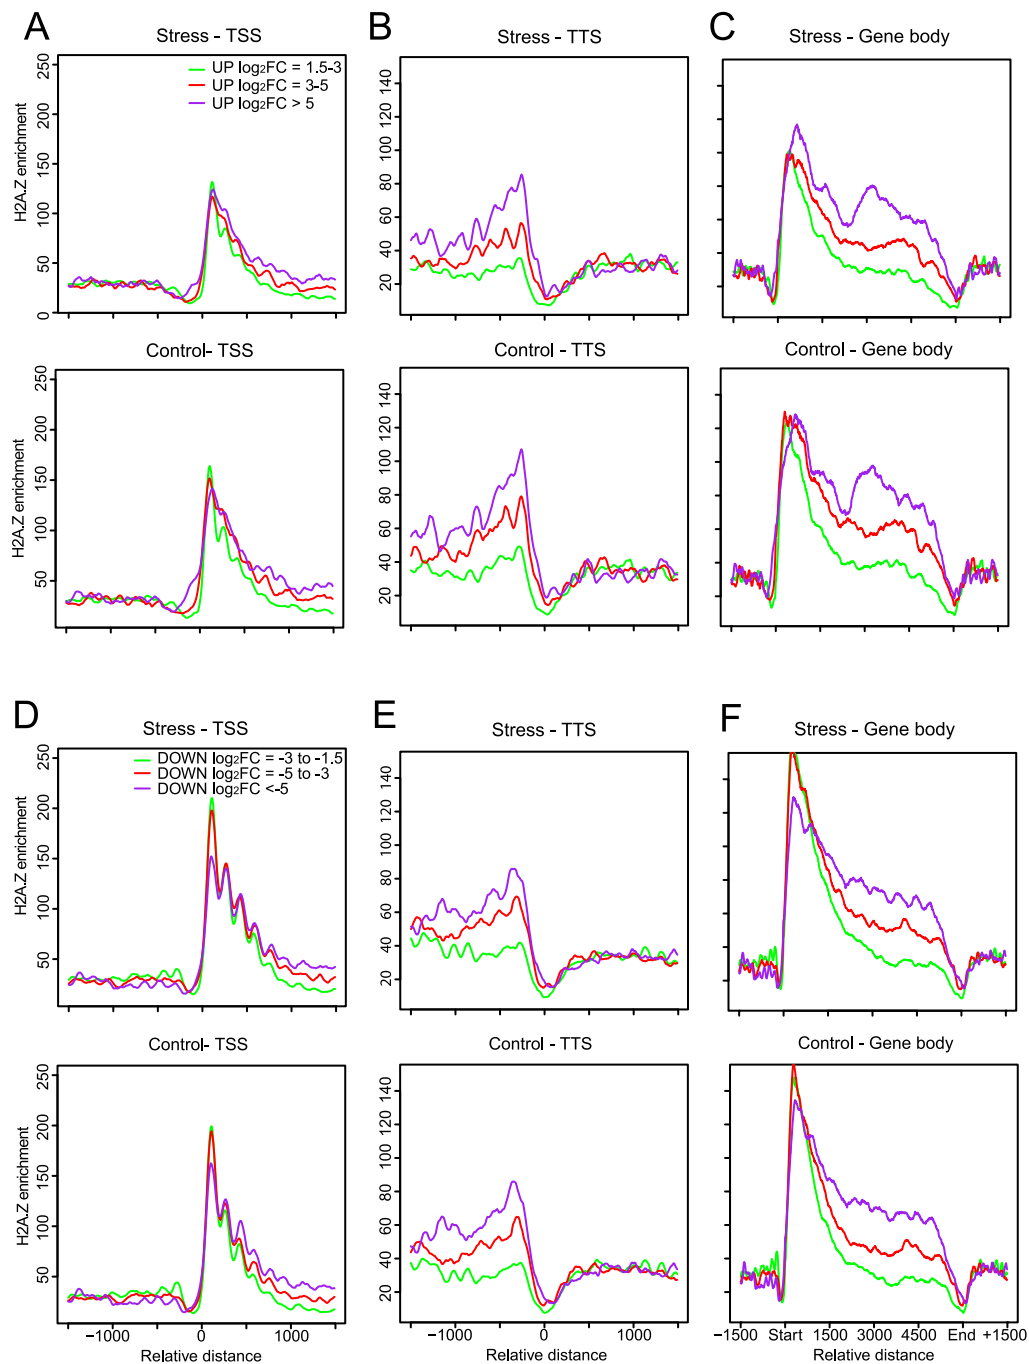

**Supplemental Fig. 5.** H2A.Z levels in gene-bodies correlates with gene responsiveness. (Supports Figure 2.) H2A.Z profiles for three gene classes divided according to the change of transcription level (for upregulated genes log<sub>2</sub> fold-change from 1.5 to 3 ( $n=644$ ), from 3 to 5 ( $n=358$ ), and  $>5$  ( $n=291$ ), and for downregulated genes  $<-5$  ( $n=463$ ), from -5 to -3 ( $n=722$ ), and from -3 to -1.5 ( $n=896$ )) are shown for genes induced (**A-C**) and repressed (**D-F**) in stress.

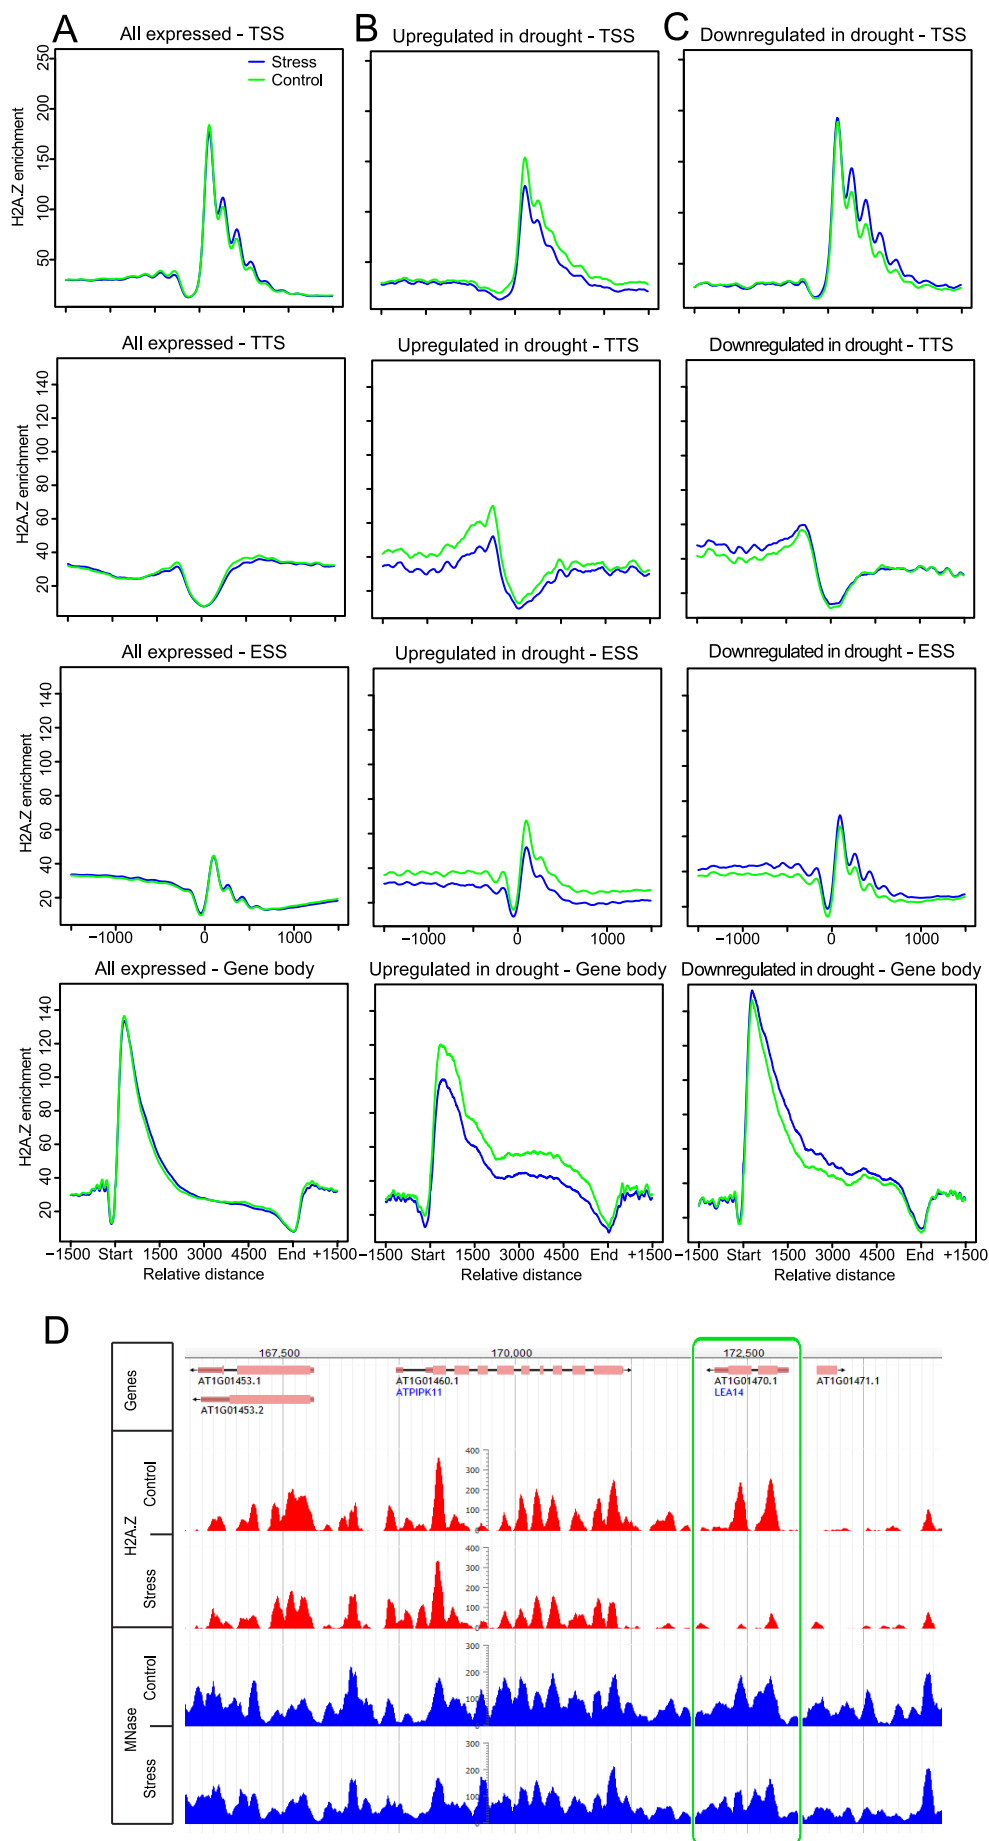

**Supplemental Fig. 6.** H2A.Z levels in control and stress conditions. (Supports Figure 3.) Changes in H2A.Z level (normalized H2A.Z-ChAP reads minus normalized MNase-seq [input]) between control (blue) and stress (green) conditions as analyzed for all expressed (**A**), stress-induced (**B**), and stress-repressed (**C**) genes. Plots are shown for TSS, TTS, ESS, and across gene bodies. (**D**) An example of changes in H2A.Z occupancy in a drought induced (color frame) gene upon transcriptional activation, created using JBrowse software (Skinner et al., 2009).

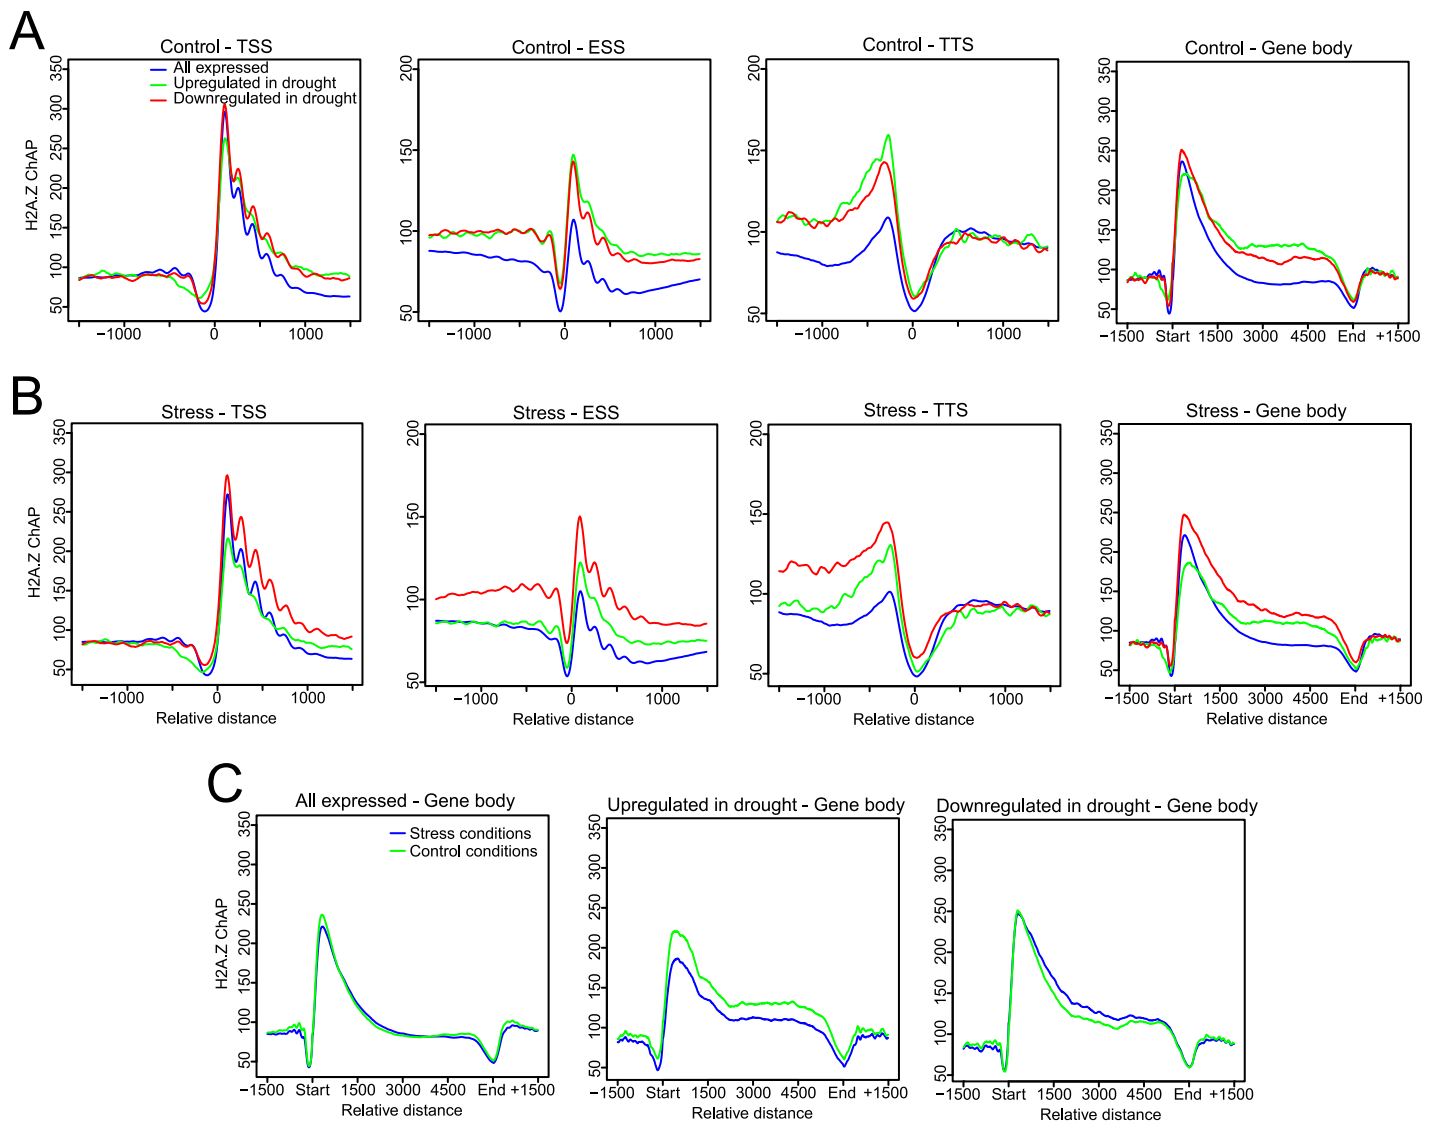

**Supplemental Fig. 7.** H2A.Z-ChAP signal in control conditions relative to TSS, ESS, TTS, and across gene body is shown for genes upregulated (green), and downregulated (red) in drought stress in comparison with 'All expressed genes' (blue). (Supports Figure 3.) The plots show the same data as in Fig. 3, but with reads data normalized only to library size. **(B)** As for (A) but in stress conditions. **(C)** Comparison of changes in H2A.Z-ChAP signals (the same normalization as for A and B) between control (blue) and stress (green) conditions shown for all expressed, stress-induced and stress-repressed genes.

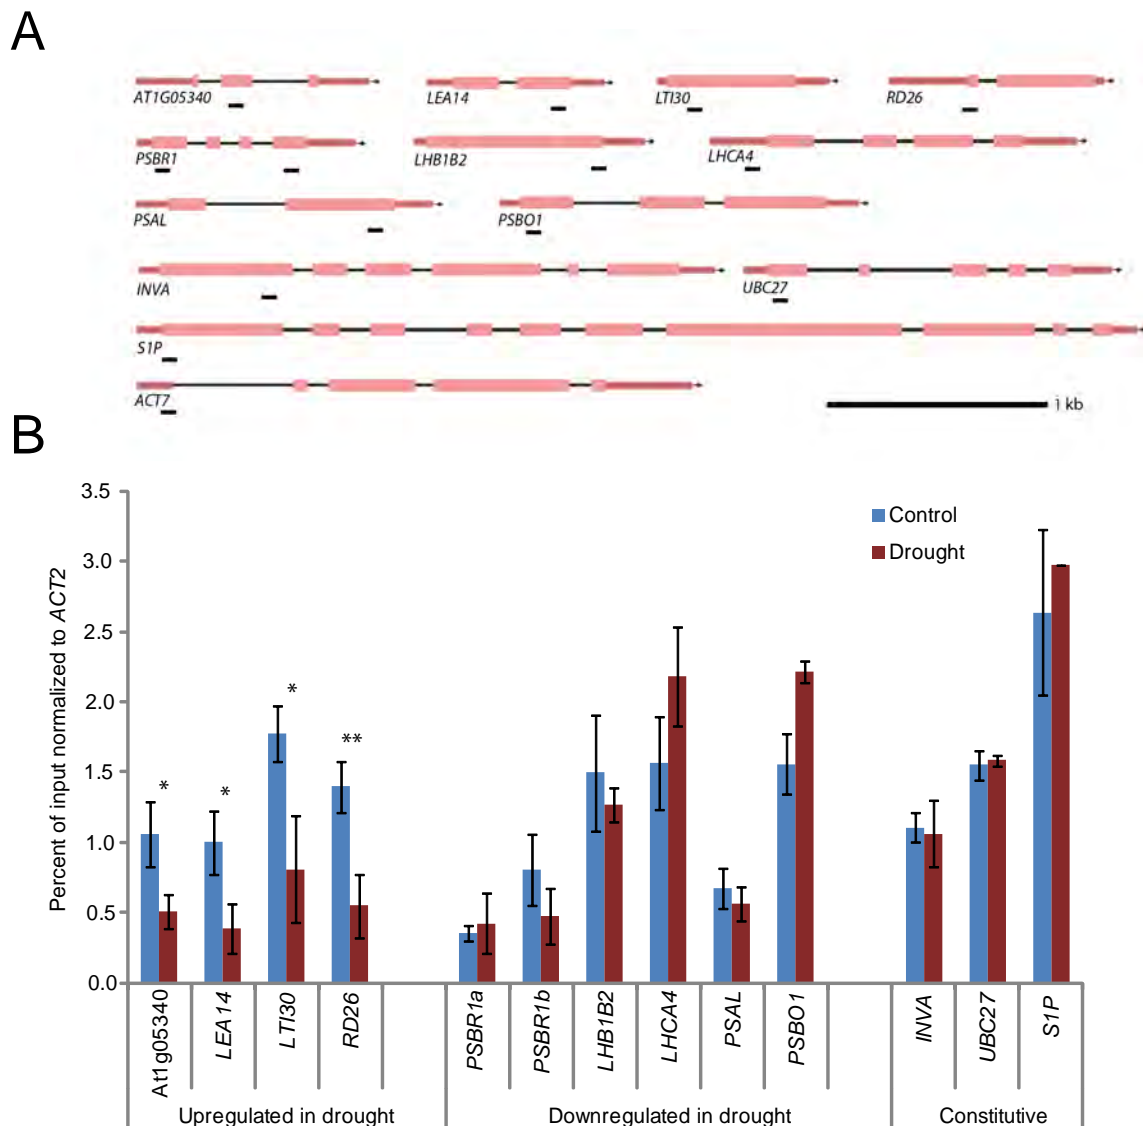

**Supplemental Fig. 8.** ChAP-qPCR validation of changes in H2A.Z occupancy in drought stress at selected genes. (Supports Figure 3.) Four-weeks-old plants were subjected to water deficit for 8 days and compared to untreated plants using an MNase assay followed by ChAP-qPCR. **(A)** Schematic representation of regions analyzed by qPCR (short black bars). **(B)** The percent of input for H2A.Z ChAP-qPCR at selected drought-responsive and constitutive genes normalized to *ACT7* ChAP-qPCR. Error bars represent SD of independent experiments. \*  $P < 0.05$ , \*\*  $P < 0.01$ .



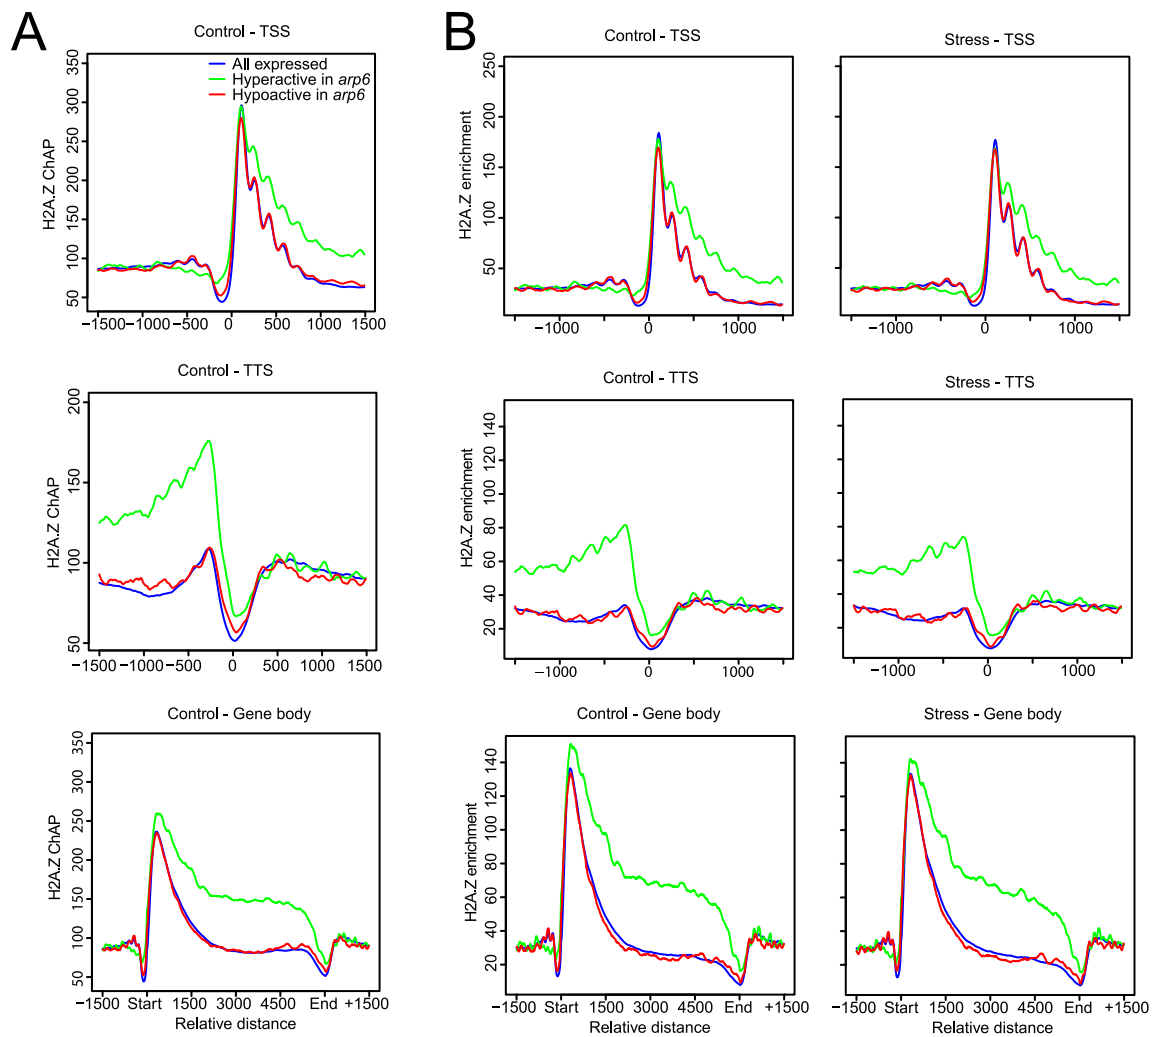

**Supplemental Fig. 9.** Genes hyperactive in *arp6* have significantly higher levels of H2A.Z across their bodies. (Supports Figure 4.) **(A)** H2A.Z ChAP (ChAP reads normalized to library size) for TSS, TTS and Gene body in control conditions. **(B)** H2A.Z enrichment (H2A.Z-ChAP reads normalized to library size minus by MNase-seq [input] reads normalized to library size) relative to TSS in control and stress conditions, relative to TTS in control and stress conditions, and across gene body in control and stress conditions is shown for genes *arp6*-upregulated (green), and *arp6*-downregulated (red) in comparison with 'All expressed' genes (blue).

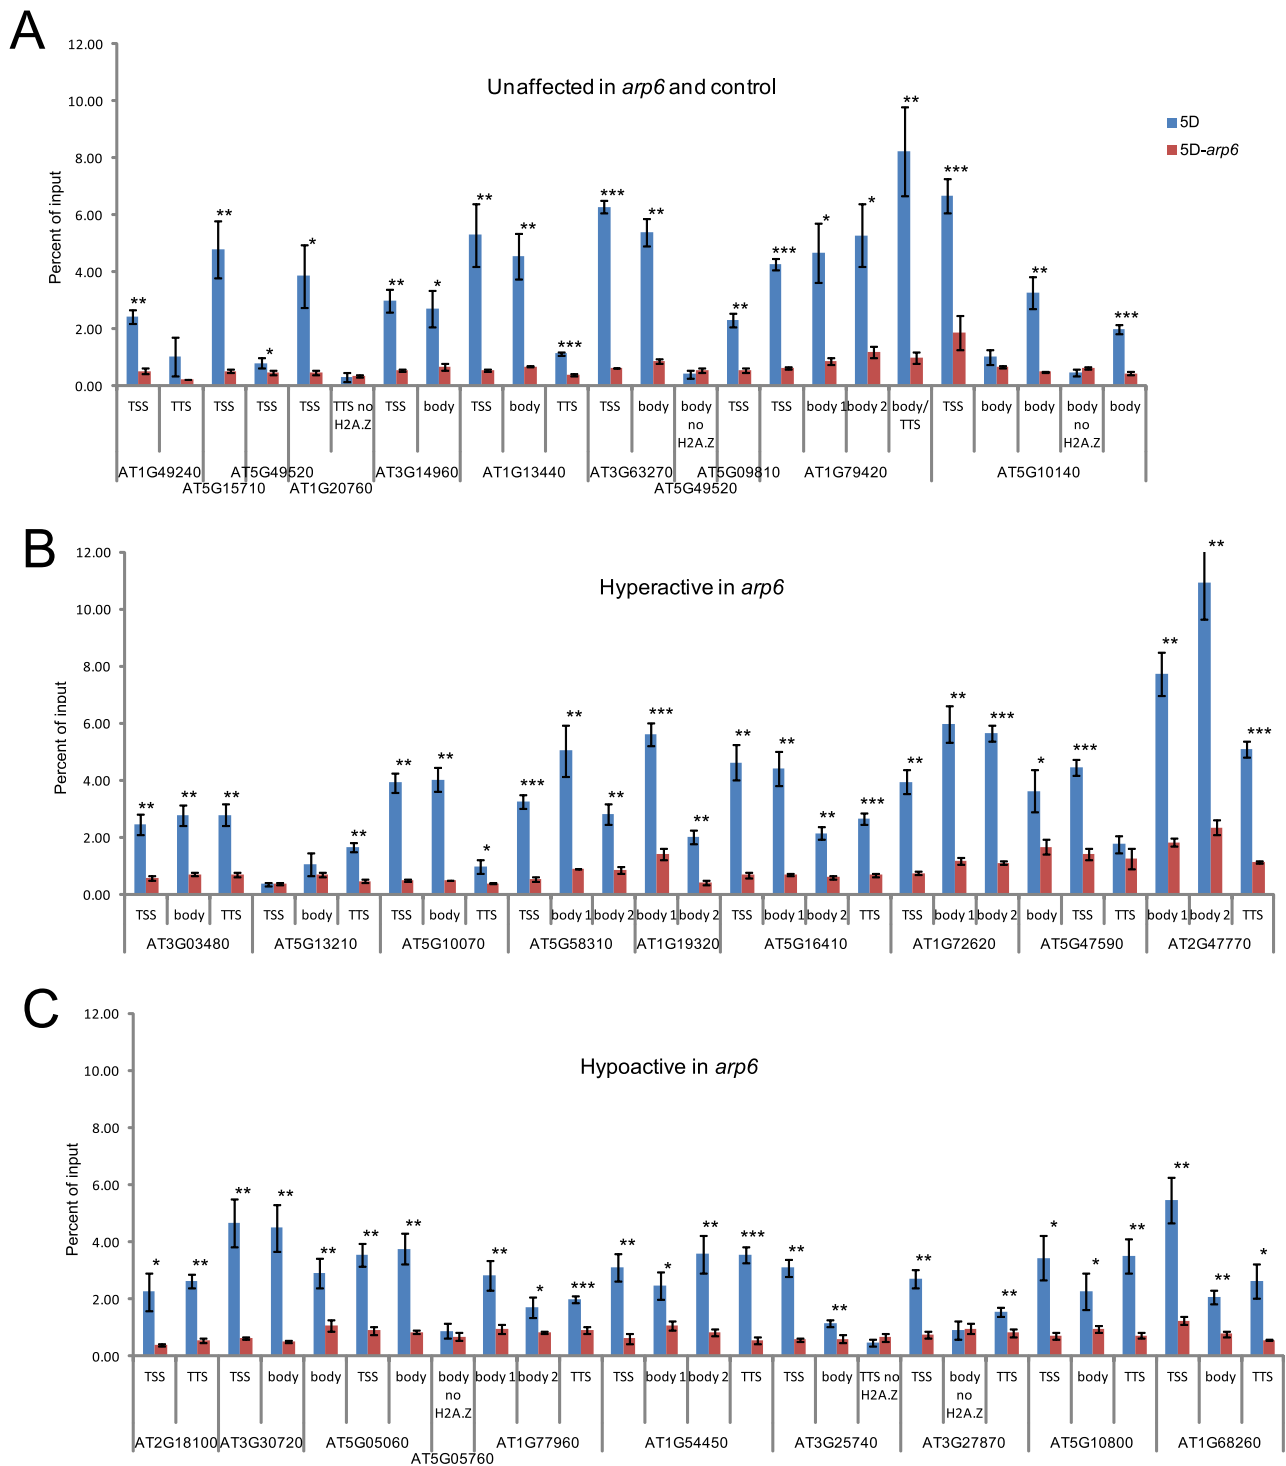

**Supplemental Fig. 10.** ARP6-dependent pathway is a major determinant of H2A.Z enrichment within Arabidopsis genes. (Supports Figure 6.) Comparison of H2A.Z enrichment (calculated as percent of input) for 5D plants (blue) and 5D-*arp6* plants (red) show significant reduction in H2A.Z levels in the absence of the ARP6 protein in genes unaffected in *arp6* (A), hyperactive in *arp6* (B) and hypoactive in *arp6* (C). Error bars represent SD of independent experiments. \*  $P < 0.05$ , \*\*  $P < 0.01$ , \*\*\*  $P < 0.001$ .

**Supplemental Table 1.** Germination assay in *wt* (Col), *arp6*, *hta9 hta11* and *pie1-5* plants in osmotic stress. *P*-values were calculated using Student's *t*-test.

| Control conditions |                 | Col     |            | <i>arp6</i> |            | <i>hta9 hta11</i> |            | <i>pie1-5</i> |            |
|--------------------|-----------------|---------|------------|-------------|------------|-------------------|------------|---------------|------------|
|                    |                 | Radicle | Cotyledons | Radicle     | Cotyledons | Radicle           | Cotyledons | Radicle       | Cotyledons |
| 21 h               | Mean            | 75.00   | 0.00       | 63.89       | 0.00       | 57.78             | 0.56       | 19.30         | 0.62       |
|                    | SD              | 10.56   | 0.00       | 8.78        | 0.00       | 13.66             | 1.76       | 10.76         | 1.85       |
|                    | <i>P</i> -value |         |            | 0.020       |            | 0.006             |            | 9.9E-10       |            |
| 24 h               | Mean            | 87.78   | 34.44      | 83.89       | 7.22       | 75.56             | 17.78      | 26.49         | 0.62       |
|                    | SD              | 7.31    | 15.67      | 7.61        | 5.27       | 9.87              | 7.77       | 12.13         | 1.85       |
|                    | <i>P</i> -value |         |            | 0.259       | 2.9E-04    | 0.006             | 0.010      | 2.3E-11       | 8.1E-05    |
| 48 h               | Mean            | 97.22   | 97.22      | 99.44       | 97.22      | 91.67             | 90.56      | 76.61         | 55.13      |
|                    | SD              | 3.93    | 3.93       | 1.76        | 2.93       | 7.05              | 8.30       | 7.86          | 9.28       |
|                    | <i>P</i> -value |         |            | 0.128       | 1.000      | 0.047             | 0.039      | 2.0E-05       | 6.9E-08    |
| 72 h               | Mean            | 98.89   | 98.89      | 99.44       | 99.44      | 93.33             | 92.78      | 88.30         | 79.04      |
|                    | SD              | 2.34    | 2.34       | 1.76        | 1.76       | 5.74              | 6.44       | 7.08          | 10.73      |
|                    | <i>P</i> -value |         |            | 0.556       | 0.556      | 0.015             | 0.017      | 0.002         | 4.2E-04    |
| 96 h               | Mean            | 98.89   | 98.89      | 100.00      | 99.44      | 94.44             | 94.44      | 90.77         | 88.92      |
|                    | SD              | 2.34    | 2.34       | 0.00        | 1.76       | 5.86              | 5.86       | 6.23          | 6.24       |
|                    | <i>P</i> -value |         |            | 0.168       | 0.556      | 0.046             | 0.046      | 0.004         | 0.001      |
| 120 h              | Mean            | 99.44   | 99.44      | 100.00      | 100.00     | 96.11             | 95.00      | 90.77         | 90.16      |
|                    | SD              | 1.76    | 1.76       | 0.00        | 0.00       | 4.57              | 6.11       | 6.23          | 6.10       |
|                    | <i>P</i> -value |         |            | 0.343       | 0.343      | 0.053             | 0.052      | 0.003         | 0.002      |
| 144 h              | Mean            | 99.44   | 99.44      | 100.00      | 100.00     | 96.11             | 96.11      | 92.59         | 92.01      |
|                    | SD              | 1.76    | 1.76       | 0.00        | 0.00       | 4.57              | 4.57       | 6.21          | 4.92       |
|                    | <i>P</i> -value |         |            |             |            |                   |            | 0.011         | 0.002      |
| 168 h              | Mean            | 99.44   | 99.44      | 100.00      | 100.00     | 96.11             | 96.11      | 92.59         | 93.21      |
|                    | SD              | 1.76    | 1.76       | 0.00        | 0.00       | 4.57              | 4.57       | 6.21          | 5.40       |
|                    | <i>P</i> -value |         |            |             |            |                   |            | 0.011         | 0.008      |
| 192 h              | Mean            | 99.44   | 99.44      | 100.00      | 100.00     | 96.11             | 96.11      | 93.83         | 93.21      |
|                    | SD              | 1.76    | 1.76       | 0.00        | 0.00       | 4.57              | 4.57       | 4.34          | 5.40       |
|                    | <i>P</i> -value |         |            |             |            |                   |            | 0.005         | 0.008      |
| 216 h              | Mean            | 99.44   | 99.44      | 100.00      | 100.00     | 96.11             | 96.11      | 94.44         | 93.83      |
|                    | SD              | 1.76    | 1.76       | 0.00        | 0.00       | 4.57              | 4.57       | 3.93          | 4.34       |
|                    | <i>P</i> -value |         |            |             |            |                   |            | 0.005         | 0.005      |
| 240 h              | Mean            | 99.44   | 99.44      | 100.00      | 100.00     | 96.11             | 96.11      | 95.06         | 93.83      |
|                    | SD              | 1.76    | 1.76       | 0.00        | 0.00       | 4.57              | 4.57       | 4.34          | 4.34       |
|                    | <i>P</i> -value |         |            |             |            |                   |            | 0.018         | 0.005      |

| 150 mM NaCl |                | Col     |            | arp6    |            | hta9 hta11 |            | pie1-5  |            |
|-------------|----------------|---------|------------|---------|------------|------------|------------|---------|------------|
|             |                | Radicle | Cotyledons | Radicle | Cotyledons | Radicle    | Cotyledons | Radicle | Cotyledons |
| 21 h        | Mean           | 0.00    | 0.00       | 0.00    | 0.00       | 0.00       | 0.00       | 0.00    | 0.00       |
|             | SD             | 0.00    | 0.00       | 0.00    | 0.00       | 0.00       | 0.00       | 0.00    | 0.00       |
|             | <i>P-value</i> |         |            |         |            |            |            |         |            |
| 24 h        | Mean           | 0.00    | 0.00       | 0.00    | 0.00       | 0.00       | 0.00       | 0.00    | 0.00       |
|             | SD             | 0.00    | 0.00       | 0.00    | 0.00       | 0.00       | 0.00       | 0.00    | 0.00       |
|             | <i>P-value</i> |         |            |         |            |            |            |         |            |
| 48 h        | Mean           | 2.78    | 0.00       | 0.56    | 0.00       | 4.44       | 0.56       | 0.00    | 0.00       |
|             | SD             | 2.93    | 0.00       | 1.76    | 0.00       | 3.51       | 1.76       | 0.00    | 0.00       |
|             | <i>P-value</i> |         |            | 0.057   |            | 0.265      | 0.343      | 0.015   |            |
| 72 h        | Mean           | 63.33   | 10.00      | 28.10   | 1.11       | 68.33      | 28.89      | 0.00    | 0.00       |
|             | SD             | 12.34   | 7.77       | 12.09   | 2.34       | 8.30       | 10.41      | 0.00    | 0.00       |
|             | <i>P-value</i> |         |            | 4.5E-06 | 0.005      | 0.304      | 2.6E-04    | 5.7E-08 | 0.003      |
| 96 h        | Mean           | 85.56   | 61.67      | 66.32   | 23.71      | 80.00      | 73.89      | 6.08    | 0.00       |
|             | SD             | 5.97    | 13.97      | 7.93    | 8.51       | 8.76       | 7.43       | 6.62    | 0.00       |
|             | <i>P-value</i> |         |            | 1.1E-05 | 2.5E-06    | 0.117      | 0.028      | 2.4E-16 | 2.1E-07    |
| 120 h       | Mean           | 95.56   | 88.89      | 82.87   | 64.09      | 86.67      | 80.56      | 15.00   | 0.00       |
|             | SD             | 5.11    | 5.24       | 7.63    | 12.86      | 9.15       | 8.78       | 6.59    | 0.00       |
|             | <i>P-value</i> |         |            | 4.7E-04 | 1.1E-04    | 0.018      | 0.021      | 2.7E-16 | 1.4E-12    |
| 144 h       | Mean           | 97.22   | 97.22      | 90.06   | 83.98      | 90.00      | 87.22      | 20.00   | 3.58       |
|             | SD             | 3.93    | 3.93       | 5.73    | 8.05       | 7.31       | 9.09       | 7.17    | 3.15       |
|             | <i>P-value</i> |         |            | 4.9E-03 | 4.3E-04    | 0.016      | 0.008      | 4.4E-14 | 4.3E-21    |
| 168 h       | Mean           | 97.22   | 97.22      | 94.47   | 89.50      | 91.11      | 91.11      | 31.08   | 7.47       |
|             | SD             | 3.93    | 3.93       | 5.24    | 7.15       | 6.52       | 6.52       | 10.07   | 6.41       |
|             | <i>P-value</i> |         |            | 0.202   | 0.010      | 0.023      | 0.023      | 2.1E-10 | 2.7E-16    |
| 192 h       | Mean           | 97.22   | 97.22      | 95.58   | 94.47      | 92.22      | 91.67      | 42.23   | 14.60      |
|             | SD             | 3.93    | 3.93       | 5.73    | 5.24       | 6.52       | 7.05       | 9.57    | 8.43       |
|             | <i>P-value</i> |         |            | 0.467   | 0.202      | 0.055      | 0.047      | 1.0E-09 | 5.0E-13    |
| 216 h       | Mean           | 97.22   | 97.22      | 95.58   | 95.58      | 92.22      | 92.22      | 46.12   | 21.82      |
|             | SD             | 3.93    | 3.93       | 5.73    | 5.73       | 6.52       | 6.52       | 10.54   | 8.39       |
|             | <i>P-value</i> |         |            | 0.467   | 0.467      | 0.055      | 0.055      | 1.8E-08 | 1.5E-12    |
| 240 h       | Mean           | 97.22   | 97.22      | 96.67   | 95.58      | 93.33      | 92.78      | 51.15   | 26.82      |
|             | SD             | 3.93    | 3.93       | 5.97    | 5.73       | 5.74       | 5.89       | 9.23    | 9.57       |
|             | <i>P-value</i> |         |            | 0.809   | 0.467      | 0.096      | 0.064      | 5.6E-09 | 5.9E-11    |

| 300 mM Sorbitol |                | Col     |            | arp6    |            | hta9 hta11 |            | pie1-5  |            |
|-----------------|----------------|---------|------------|---------|------------|------------|------------|---------|------------|
|                 |                | Radicle | Cotyledons | Radicle | Cotyledons | Radicle    | Cotyledons | Radicle | Cotyledons |
| 21 h            | Mean           | 0.00    | 0.00       | 0.00    | 0.00       | 0.00       | 0.00       | 0.00    | 0.00       |
|                 | SD             | 0.00    | 0.00       | 0.00    | 0.00       | 0.00       | 0.00       | 0.00    | 0.00       |
|                 | <i>P-value</i> |         |            |         |            |            |            |         |            |
| 24 h            | Mean           | 0.00    | 0.00       | 0.00    | 0.00       | 0.00       | 0.00       | 0.00    | 0.00       |
|                 | SD             | 0.00    | 0.00       | 0.00    | 0.00       | 0.00       | 0.00       | 0.00    | 0.00       |
|                 | <i>P-value</i> |         |            |         |            |            |            |         |            |
| 48 h            | Mean           | 17.22   | 5.00       | 3.33    | 0.56       | 11.67      | 3.89       | 1.11    | 0.00       |
|                 | SD             | 13.72   | 6.11       | 3.88    | 1.76       | 9.60       | 4.57       | 2.34    | 0.00       |
|                 | <i>P-value</i> |         |            | 0.012   | 0.052      | 0.310      | 0.651      | 0.004   | 0.029      |
| 72 h            | Mean           | 89.44   | 68.89      | 52.22   | 10.00      | 76.11      | 59.44      | 15.85   | 2.22       |
|                 | SD             | 8.05    | 13.66      | 12.34   | 6.31       | 11.13      | 11.43      | 7.91    | 3.88       |
|                 | <i>P-value</i> |         |            | 8.8E-07 | 1.4E-08    | 0.007      | 0.112      | 5.7E-14 | 3.9E-08    |
| 96 h            | Mean           | 96.11   | 92.78      | 72.22   | 37.78      | 82.78      | 80.00      | 38.50   | 9.92       |
|                 | SD             | 4.57    | 4.57       | 5.24    | 15.23      | 9.60       | 11.17      | 12.00   | 7.33       |
|                 | <i>P-value</i> |         |            | 2.5E-09 | 3.0E-07    | 0.002      | 0.006      | 7.3E-09 | 7.0E-15    |
| 120 h           | Mean           | 96.67   | 96.11      | 83.89   | 72.78      | 87.78      | 84.44      | 57.93   | 19.24      |
|                 | SD             | 3.88    | 4.57       | 4.10    | 11.25      | 8.61       | 9.37       | 15.78   | 12.35      |
|                 | <i>P-value</i> |         |            | 1.2E-06 | 5.5E-05    | 0.011      | 0.004      | 2.0E-05 | 1.3E-09    |
| 144 h           | Mean           | 96.67   | 96.67      | 87.78   | 82.22      | 88.33      | 87.78      | 65.51   | 43.47      |
|                 | SD             | 3.88    | 3.88       | 5.11    | 4.38       | 8.86       | 8.61       | 13.27   | 11.97      |
|                 | <i>P-value</i> |         |            | 4.1E-04 | 3.5E-07    | 0.018      | 0.011      | 1.9E-05 | 3.8E-08    |
| 168 h           | Mean           | 97.78   | 96.67      | 91.11   | 86.67      | 90.56      | 88.33      | 70.02   | 52.22      |
|                 | SD             | 3.88    | 3.88       | 4.68    | 3.88       | 6.95       | 8.86       | 14.02   | 11.13      |
|                 | <i>P-value</i> |         |            | 0.003   | 1.9E-05    | 0.012      | 0.018      | 1.3E-04 | 1.2E-07    |
| 192 h           | Mean           | 98.33   | 97.78      | 93.33   | 91.67      | 90.56      | 90.56      | 77.04   | 57.69      |
|                 | SD             | 3.75    | 3.88       | 5.11    | 4.72       | 6.95       | 6.95       | 10.11   | 11.02      |
|                 | <i>P-value</i> |         |            | 0.023   | 0.006      | 0.008      | 0.012      | 6.3E-05 | 3.2E-07    |
| 216 h           | Mean           | 98.33   | 98.33      | 95.56   | 93.33      | 91.67      | 90.56      | 79.20   | 63.22      |
|                 | SD             | 3.75    | 3.75       | 3.51    | 5.11       | 7.97       | 6.95       | 9.09    | 10.40      |
|                 | <i>P-value</i> |         |            | 0.105   | 0.023      | 0.032      | 0.008      | 4.9E-05 | 7.1E-07    |
| 240 h           | Mean           | 98.33   | 98.33      | 97.22   | 94.44      | 91.67      | 91.11      | 81.43   | 66.53      |
|                 | SD             | 3.75    | 3.75       | 3.93    | 3.70       | 7.97       | 7.50       | 10.22   | 11.22      |
|                 | <i>P-value</i> |         |            | 0.526   | 0.031      | 0.032      | 0.017      | 4.6E-04 | 3.6E-06    |

**Supplemental Table 2.** ChAP-qPCR analysis of H2A.Z enrichment (calculated as percent of input) for 5D and 5D-*arp6* plants in 78 amplicons corresponding to different genic regions and gene groups (unaffected in *arp6*, hyperactive in *arp6* and hypoactive in *arp6*).

| Amplicon name | Gene      | Genic region  | 5D*  | <i>arp6</i> -5D* | 5D SD | <i>arp6</i> -5D SD | Difference 5D - <i>arp6</i> -5D | Expression in <i>arp6</i> | P value** | Significance* |
|---------------|-----------|---------------|------|------------------|-------|--------------------|---------------------------------|---------------------------|-----------|---------------|
| PZ113         | AT2G18100 | TSS           | 2.27 | 0.40             | 0.66  | 0.03               | 1.87                            | Hypoactive                | 0.0194    | *             |
| PZ115         |           | TTS           | 2.64 | 0.55             | 0.23  | 0.06               | 2.09                            | Hypoactive                | 0.0011    | **            |
| PZ103         | AT3G30720 | TSS           | 4.68 | 0.65             | 0.84  | 0.05               | 4.03                            | Hypoactive                | 0.0070    | **            |
| PZ105         |           | body          | 4.49 | 0.53             | 0.81  | 0.04               | 3.95                            | Hypoactive                | 0.0068    | **            |
| PZ025         | AT5G05060 | body          | 2.91 | 1.08             | 0.54  | 0.21               | 1.84                            | Hypoactive                | 0.0085    | **            |
| PZ077         |           | TSS           | 3.54 | 0.90             | 0.40  | 0.13               | 2.64                            | Hypoactive                | 0.0020    | **            |
| PZ079         |           | body          | 3.77 | 0.84             | 0.53  | 0.06               | 2.92                            | Hypoactive                | 0.0049    | **            |
| PZ081         | AT5G05760 | body no H2A.Z | 0.88 | 0.69             | 0.26  | 0.13               | 0.19                            | Hypoactive                | 0.1684    |               |
| PZ093         | AT1G77960 | body 1        | 2.84 | 0.95             | 0.52  | 0.17               | 1.89                            | Hypoactive                | 0.0082    | **            |
| PZ095         |           | body 2        | 1.73 | 0.83             | 0.36  | 0.04               | 0.90                            | Hypoactive                | 0.0238    | *             |
| PZ091         |           | TTS           | 2.01 | 0.91             | 0.13  | 0.11               | 1.10                            | Hypoactive                | 0.0002    | ***           |
| PZ083         | AT1G54450 | TSS           | 3.10 | 0.62             | 0.49  | 0.17               | 2.48                            | Hypoactive                | 0.0036    | **            |
| PZ085         |           | body 1        | 2.47 | 1.08             | 0.47  | 0.16               | 1.39                            | Hypoactive                | 0.0129    | *             |
| PZ087         |           | body 2        | 3.57 | 0.82             | 0.68  | 0.12               | 2.75                            | Hypoactive                | 0.0085    | **            |
| PZ089         |           | TTS           | 3.54 | 0.55             | 0.29  | 0.13               | 2.99                            | Hypoactive                | 0.0004    | ***           |
| PZ071         | AT3G25740 | TSS           | 3.09 | 0.58             | 0.29  | 0.06               | 2.51                            | Hypoactive                | 0.0017    | **            |
| PZ073         |           | body          | 1.16 | 0.61             | 0.13  | 0.14               | 0.54                            | Hypoactive                | 0.0039    | **            |
| PZ075         |           | TTS no H2A.Z  | 0.48 | 0.66             | 0.12  | 0.12               | -0.17                           | Hypoactive                | 0.0765    |               |
| PZ065         | AT3G27870 | TSS           | 2.72 | 0.75             | 0.33  | 0.11               | 1.96                            | Hypoactive                | 0.0026    | **            |
| PZ069         |           | body no H2A.Z | 0.91 | 0.97             | 0.32  | 0.18               | -0.07                           | Hypoactive                | 0.3874    |               |
| PZ067         |           | TTS           | 1.56 | 0.82             | 0.18  | 0.14               | 0.74                            | Hypoactive                | 0.0029    | **            |
| PZ097         | AT5G10800 | TSS           | 3.45 | 0.72             | 0.78  | 0.13               | 2.73                            | Hypoactive                | 0.0119    | *             |
| PZ099         |           | body          | 2.28 | 0.95             | 0.64  | 0.14               | 1.32                            | Hypoactive                | 0.0317    | *             |
| PZ101         |           | TTS           | 3.51 | 0.73             | 0.61  | 0.11               | 2.78                            | Hypoactive                | 0.0069    | **            |
| PZ107         | AT1G68260 | TSS           | 5.47 | 1.25             | 0.78  | 0.13               | 4.22                            | Hypoactive                | 0.0049    | **            |
| PZ109         |           | body          | 2.08 | 0.78             | 0.25  | 0.10               | 1.30                            | Hypoactive                | 0.0027    | **            |
| PZ111         |           | TTS           | 2.62 | 0.57             | 0.60  | 0.02               | 2.05                            | Hypoactive                | 0.0137    | *             |
| PZ117         | AT1G49240 | TSS           | 2.42 | 0.52             | 0.25  | 0.09               | 1.90                            | Unaffected                | 0.0013    | **            |
| PZ119         |           | TTS           | 1.02 | 0.22             | 0.67  | 0.01               | 0.80                            | Unaffected                | 0.0868    |               |
| PZ155         | AT5G15710 | TSS           | 4.79 | 0.52             | 0.99  | 0.07               | 4.26                            | Unaffected                | 0.0085    | **            |
| PZ157         | AT5G49520 | TSS           | 0.80 | 0.47             | 0.17  | 0.07               | 0.33                            | Unaffected                | 0.0341    | *             |
| PZ121         | AT1G20760 | TSS           | 3.85 | 0.48             | 1.10  | 0.08               | 3.37                            | Unaffected                | 0.0167    | *             |
| PZ123         |           | TTS no H2A.Z  | 0.32 | 0.34             | 0.16  | 0.03               | -0.01                           | Unaffected                | 0.4459    |               |
| PZ129         | AT3G14960 | TSS           | 3.00 | 0.54             | 0.40  | 0.05               | 2.46                            | Unaffected                | 0.0039    | **            |

|           |           |               |      |      |      |      |       |             |        |     |
|-----------|-----------|---------------|------|------|------|------|-------|-------------|--------|-----|
| PZ131     |           | body          | 2.70 | 0.68 | 0.63 | 0.11 | 2.02  | Unaffected  | 0.0140 | *   |
| PZ147     | AT1G13440 | TSS           | 5.30 | 0.54 | 1.10 | 0.03 | 4.76  | Unaffected  | 0.0086 | **  |
| PZ149     |           | body          | 4.56 | 0.68 | 0.81 | 0.03 | 3.88  | Unaffected  | 0.0071 | **  |
| PZ151     |           | TTS           | 1.14 | 0.39 | 0.05 | 0.04 | 0.75  | Unaffected  | 0.0000 | *** |
| PZ125     | AT3G63270 | TSS           | 6.28 | 0.62 | 0.22 | 0.01 | 5.66  | Unaffected  | 0.0002 | *** |
| PZ127     |           | body          | 5.38 | 0.87 | 0.49 | 0.09 | 4.52  | Unaffected  | 0.0015 | **  |
| PZ159     | AT5G49520 | body no H2A.Z | 0.41 | 0.54 | 0.13 | 0.07 | -0.13 | Unaffected  | 0.1156 |     |
| CHIP_Act7 | AT5G09810 | TSS           | 2.31 | 0.55 | 0.25 | 0.09 | 1.76  | Unaffected  | 0.0017 | **  |
| PZ139     | AT1G79420 | TSS           | 4.26 | 0.63 | 0.20 | 0.04 | 3.62  | Unaffected  | 0.0003 | *** |
| PZ141     |           | body 1        | 4.68 | 0.88 | 1.03 | 0.12 | 3.79  | Unaffected  | 0.0113 | *   |
| PZ143     |           | body 2        | 5.28 | 1.18 | 1.10 | 0.19 | 4.10  | Unaffected  | 0.0104 | *   |
| PZ145     |           | body/<br>TTS  | 8.23 | 0.99 | 1.57 | 0.19 | 7.24  | Unaffected  | 0.0072 | **  |
| FLC-2     | AT5G10140 | TSS           | 6.67 | 1.88 | 0.61 | 0.59 | 4.79  | Control     | 0.0003 | *** |
| FLC-7     |           | body          | 1.01 | 0.66 | 0.24 | 0.05 | 0.35  | Control     | 0.0621 |     |
| FLC-9     |           | body          | 3.27 | 0.49 | 0.54 | 0.02 | 2.78  | Control     | 0.0061 | **  |
| FLC-6     |           | body no H2A.Z | 0.47 | 0.62 | 0.12 | 0.04 | -0.15 | Control     | 0.0789 |     |
| FLC-1     |           | body no H2A.Z | 1.98 | 0.45 | 0.15 | 0.07 | 1.53  | Control     | 0.0004 | *** |
| PZ019     | AT3G03480 | TSS           | 2.45 | 0.57 | 0.36 | 0.07 | 1.88  | Hyperactive | 0.0050 | **  |
| PZ021     |           | body          | 2.76 | 0.71 | 0.36 | 0.06 | 2.06  | Hyperactive | 0.0043 | **  |
| PZ023     |           | TTS           | 2.79 | 0.70 | 0.38 | 0.07 | 2.09  | Hyperactive | 0.0046 | **  |
| PZ059     | AT5G13210 | TSS           | 0.37 | 0.38 | 0.05 | 0.04 | -0.01 | Hyperactive | 0.3860 |     |
| PZ061     |           | body          | 1.05 | 0.70 | 0.41 | 0.08 | 0.35  | Hyperactive | 0.1357 |     |
| PZ063     |           | TTS           | 1.64 | 0.48 | 0.16 | 0.04 | 1.16  | Hyperactive | 0.0020 | **  |
| PZ133     | AT5G10070 | TSS           | 3.93 | 0.49 | 0.34 | 0.03 | 3.44  | Hyperactive | 0.0015 | **  |
| PZ135     |           | body          | 4.03 | 0.50 | 0.41 | 0.01 | 3.53  | Hyperactive | 0.0022 | **  |
| PZ137     |           | TTS           | 0.96 | 0.40 | 0.24 | 0.02 | 0.57  | Hyperactive | 0.0276 | *   |
| PZ041     | AT5G58310 | TSS           | 3.26 | 0.54 | 0.23 | 0.07 | 2.72  | Hyperactive | 0.0006 | *** |
| PZ045     |           | body 1        | 5.04 | 0.90 | 0.90 | 0.02 | 4.14  | Hyperactive | 0.0077 | **  |
| PZ043     |           | body 2        | 2.83 | 0.85 | 0.36 | 0.12 | 1.98  | Hyperactive | 0.0032 | **  |
| PZ049     | AT1G19320 | body 1        | 5.62 | 1.41 | 0.41 | 0.20 | 4.21  | Hyperactive | 0.0003 | *** |
| PZ051     |           | body 2        | 2.02 | 0.43 | 0.25 | 0.08 | 1.59  | Hyperactive | 0.0022 | **  |
| PZ027     | AT5G16410 | TSS           | 4.63 | 0.68 | 0.62 | 0.11 | 3.95  | Hyperactive | 0.0033 | **  |
| PZ029     |           | body 1        | 4.43 | 0.71 | 0.60 | 0.04 | 3.72  | Hyperactive | 0.0041 | **  |
| PZ031     |           | body 2        | 2.14 | 0.60 | 0.22 | 0.06 | 1.54  | Hyperactive | 0.0023 | **  |
| PZ033     |           | TTS           | 2.65 | 0.69 | 0.20 | 0.06 | 1.96  | Hyperactive | 0.0008 | *** |
| PZ035     | AT1G72620 | TSS           | 3.94 | 0.76 | 0.42 | 0.07 | 3.18  | Hyperactive | 0.0025 | **  |
| PZ039     |           | body 1        | 5.97 | 1.19 | 0.62 | 0.13 | 4.78  | Hyperactive | 0.0021 | **  |
| PZ037     |           | body 2        | 5.66 | 1.11 | 0.28 | 0.06 | 4.55  | Hyperactive | 0.0004 | *** |
| PZ015     | AT5G47590 | body          | 3.63 | 1.67 | 0.74 | 0.26 | 1.96  | Hyperactive | 0.0163 | *   |
| PZ013     |           | TSS           | 4.46 | 1.41 | 0.29 | 0.20 | 3.05  | Hyperactive | 0.0001 | *** |

|       |           |        |       |      |      |      |      |             |        |     |
|-------|-----------|--------|-------|------|------|------|------|-------------|--------|-----|
| PZ017 |           | TTS    | 1.76  | 1.26 | 0.30 | 0.37 | 0.50 | Hyperactive | 0.0723 |     |
| PZ053 | AT2G47770 | body 1 | 7.74  | 1.83 | 0.76 | 0.14 | 5.91 | Hyperactive | 0.0022 | **  |
| PZ055 |           | body 2 | 10.93 | 2.35 | 1.30 | 0.28 | 8.57 | Hyperactive | 0.0029 | **  |
| PZ057 |           | TTS    | 5.09  | 1.14 | 0.29 | 0.05 | 3.95 | Hyperactive | 0.0007 | *** |

\* BLRP-H2A.Z enrichment calculated as percent of input; average values from three biological replicates;

\*\* *P*-value for the difference between H2A.Z enrichment in 5D and arp6-5D lines calculated as one-tailed t-test assuming unequal variances.



**Supplemental Table 3.** List of primers used for ChAP-qPCR and RT-qPCR analyses

| Amplicon Name | Gene        | Left Primer Sequence       | Right Primer Sequence      | Used for RT-qPCR? |
|---------------|-------------|----------------------------|----------------------------|-------------------|
| PZ013         | AT5G47590.1 | TCGAACTTTAGGAATTCTTGACATGT | AGAGAGAGATGGGTGAGACAA      |                   |
| PZ015         | AT5G47590.1 | ATGTCCACTGCAAAGTGAGC       | TCGCAAGGGAGACTAATTG        | yes               |
| PZ017         | AT5G47590.1 | TCACTTGATTCGATAGCAAACACA   | TGAGACATTGTGTGTGTGAGAGA    |                   |
| PZ019         | AT3G03480.1 | GAGAGGCTTGAGCTCTCGTG       | AAGGTGCATCGCCAGCAG         |                   |
| PZ021         | AT3G03480.1 | TCCCTGATGCCACAAACATAGG     | ACTACGTCCGTTCAAGTGACC      | yes               |
| PZ023         | AT3G03480.1 | TCTGCTACGAACGTCTCCATC      | AGGTGAGACAGGTACAGTTGTG     |                   |
| PZ025         | AT5G05060.1 | CGTGATGTAGAGTGTGATTGCAG    | GAACTTGTCAAGTTTTGAGAGC     | yes               |
| PZ027         | AT5G16410.1 | AACCCTGTTTTCCGGCAAAG       | CACGAGGAAGGAGGTCGTTG       |                   |
| PZ029         | AT5G16410.1 | TCGGAGTTCACGTCAGCAG        | ACGAGATTCTCTGCAGTAACGG     |                   |
| PZ031         | AT5G16410.1 | GTCGTGGCTTTAAGAGGGATC      | CTCGATCCGATATACCGATTTTCG   | yes               |
| PZ033         | AT5G16410.1 | GGAGCCACCGTTTTCCAC         | ACCCGGGAGCAGAGCTG          |                   |
| PZ035         | AT1G72620.1 | TTCAGATCATCACCCTGTAATGG    | ATCGACGGAGAATATGAACGAAGC   |                   |
| PZ037         | AT1G72620.1 | AAACACGGCGGAGATGTATC       | CAACCGTAGATCTCTCGGATTAC    | yes               |
| PZ039         | AT1G72620.1 | TTCTGCGATCTCCGTCCAATC      | TGGCCGGAGATCCAGAAATG       |                   |
| PZ041         | AT5G58310.1 | AGCTTGTACCAACACCATCCTC     | TGAGCATCATTTTGTGTTTGTGC    |                   |
| PZ043         | AT5G58310.1 | AGAGTTGGTAATAAAGGACACACC   | ACCTGAGTATGTTCCGGACAAG     |                   |
| PZ045         | AT5G58310.1 | TTGATCGTTGGGAAGTTGGG       | CTTCTTTGGATGACTACGACGAG    | yes               |
| PZ049         | AT1G19320.1 | CCGGTACAACCTTACCTTAAC      | GTTTGCAGTGAGGATTCCAG       |                   |
| PZ051         | AT1G19320.1 | AAGCCGGAGTATTGTTGCAC       | TAATTCGTGGGCGGACAAGTC      | yes               |
| PZ053         | AT2G47770.1 | TGTTCTTCGATTCTGTTTTGGAC    | CCGCGGTATCTGATGTCCTG       |                   |
| PZ055         | AT2G47770.1 | CACCTCTGTGGCTCCTACAC       | GCAGCCAAACCCATCAGAC        | yes               |
| PZ057         | AT2G47770.1 | ACCATAAAAGATGTCTTTGCGATCC  | GTTTATGTCTATTACTCCACAATGAC |                   |
| PZ059         | AT5G13210.1 | CCTTATTAGTTTGTGACAACCTTCGG | ATGTGAAATAAGCCGACTACCTTAGC |                   |
| PZ061         | AT5G13210.1 | AGTGGCCGTACAAGAGAAGC       | CACTGAACACAAACACCCTCTTG    | yes               |
| PZ063         | AT5G13210.1 | CAATCGATGCTCTCTACACG       | AGTGATTGTTTCCGGCGAAC       |                   |
| PZ065         | AT3G27870.1 | TCTCAGATTGGTTCAAGAGGTT     | AGCTTCAGGATTATCAGGATCATT   |                   |
| PZ067         | AT3G27870.1 | TGAACAGAGGAGAACAGAACGG     | AACTCAACTGCACCGGAAG        | yes               |
| PZ069         | AT3G27870.1 | CACGCTGTTTTGGTATGAAGC      | AGCACGACATGTACCAATCG       |                   |
| PZ071         | AT3G25740.1 | CACCAGGGAAAAATGTTGCAG      | AGCTCCGGCGAGGTATATTAAC     |                   |
| PZ073         | AT3G25740.1 | AGCAAAGTTCAGAGATATCAAGTG   | GCTCACACGCTTTCTTCATTTTC    | yes               |
| PZ075         | AT3G25740.1 | ACATGGCCTGACAAATGGAC       | AAGAATTGTATGCTCAAACCTGTGC  |                   |
| PZ077         | AT5G05760.1 | CCACCGTCCGATCTCTGAAC       | GCCGGTGACTTTAGTTCAATTCC    |                   |
| PZ079         | AT5G05760.1 | AGCCTCGTGATCTTCTGTGAC      | AATAAGAAGGCTTCCCGGATCG     | yes               |
| PZ081         | AT5G05760.1 | GCTTAGTAGCTCCATAAGTCTG     | CCAAGTTGGTCATTACACTGCTG    |                   |
| PZ083         | AT1G54450.1 | TTGATTAGATTTTCATCGACATTGGC | ACGTTAGATATAGAGCTGTTGCAG   |                   |
| PZ085         | AT1G54450.1 | AGAAAGAGGAGGCCATTGC        | GCACGAATTCAGGGTCCAATAG     |                   |
| PZ087         | AT1G54450.1 | GCGCCATGCATTCCATTCTATG     | ATGGAGTTTTGACGCGGAAC       | yes               |
| PZ089         | AT1G54450.1 | AGCATCTTCGACATCTTCTCC      | GTGGGATCGTTTTGCTCATAGAG    |                   |

|       |             |                            |                             |     |
|-------|-------------|----------------------------|-----------------------------|-----|
| PZ091 | AT1G77960.1 | TAACCTGTAAAACAAGGTGTCCAC   | TCTTATGGTACCTGTGATTTCTCG    |     |
| PZ093 | AT1G77960.1 | TGGGGGTATGATTGCGTTTG       | CCATTGAGGTTTAGGTTACCCAAC    |     |
| PZ095 | AT1G77960.1 | TGGGAGGTTCAATTTGCCTACG     | TGGCATGTATCCACAGCAAC        | yes |
| PZ097 | AT5G10800.1 | GGGTGATCGAGAAAGAACTCATC    | TTGGTGCCGTGCTATTATCG        |     |
| PZ099 | AT5G10800.1 | GCCTCCAGTTCTACTAGATGAAGC   | AGCTCAAGCCTGATTCTCAAGG      |     |
| PZ101 | AT5G10800.1 | CTCGCTCTCTGCTTCTATCATG     | GGACCGAAAACGAAGAGCAAAG      | yes |
| PZ103 | AT3G30720.1 | AACCTCCTTTGATCTGTCAGC      | TCAATGGCTGACCGTGTGAG        | yes |
| PZ105 | AT3G30720.1 | CCAGGTTATAGAAGATCTGGGTTG   | AGGATGAAAAGAATATTACCTGTGGAG |     |
| PZ107 | AT1G68260.1 | TGCCTCCTTTGAGATCGAAG       | TTCCTCTCCGGAGCGTAAAAAC      |     |
| PZ109 | AT1G68260.1 | GTCAACTCTGAAATTGCTAAGGC    | TCGGTATCAACTGCGACGAAG       | yes |
| PZ111 | AT1G68260.1 | AGGACGGTACTTGTGTGCGAG      | CCTATATTGGAGGCAAAAGGAATAGC  |     |
| PZ113 | AT2G18100.1 | TACCGGAGAGCCAATCAGCAG      | ACCCAGAGATCCGCCTCATC        |     |
| PZ115 | AT2G18100.1 | ATCCTGGAAAGACTCGAACTCG     | TGGGTTTAGTTAGAGAGTGTTTTCG   | yes |
| PZ117 | AT1G49240.1 | TTCATCGGCCGTTGCATTTT       | ACGATGAAGATCTGGCTCACTC      | yes |
| PZ119 | AT1G49240.1 | CGAGTTTTAGAACAAATCAGTAAGC  | AACTTGGTGCACCGATGTAC        |     |
| PZ121 | AT1G20760.1 | CGAATCGGGCAATTTTCGTC       | ACTGAGATTAGAGCTTAGAAATCG    |     |
| PZ123 | AT1G20760.1 | AGGATTTCACTGGTAGCCATGG     | AAGGGACCTGTGGAACCAAC        | yes |
| PZ125 | AT3G63270.1 | ATGGCACTGCGTTGACTCTC       | CTGGATAAGGCGAAGAAGTTGG      |     |
| PZ127 | AT3G63270.1 | TGACGAGCGAGCAAATGTAG       | GACGAAGACTATGCGTTCAAGC      | yes |
| PZ129 | AT3G14960.1 | GACGATCAAAGGCGTCGATC       | TTCTCCCAAGCTGTTTCACG        | yes |
| PZ131 | AT3G14960.1 | CGGTTGAGAGAAGGTTGAATCAG    | CTCAGGAACACATGGATGCC        |     |
| PZ133 | AT5G10070.2 | GCAAGATTATCAGTCCGACCAC     | CGGGAAGCATAATCGATCTAAAGG    |     |
| PZ135 | AT5G10070.2 | GCAGATCACATAACCACCACAC     | CGCTTCTCTTGATCAAGGTAC       |     |
| PZ137 | AT5G10070.2 | ATCAAATAGGATTTCTCCAATGGC   | ATTAGAAGACAGTGAGGAGGAAG     | yes |
| PZ139 | AT1G79420.1 | GAGCAACTCAAAGTCATACTGGAG   | TAACGGTGTTAGGGCTTGTGG       |     |
| PZ141 | AT1G79420.1 | GGTCCAACCACTTTGCAACAG      | CAAGAGCCTCAAGTCTTGTCC       |     |
| PZ143 | AT1G79420.1 | GAGCTTGTTCTCGGTGGAAC       | TGGCGCCAACTGTTTTACC         | yes |
| PZ145 | AT1G79420.1 | GAGGCGGTTTACTGGGAGAC       | CGTCAACGTCACGGTAATCTC       |     |
| PZ147 | AT1G13440.1 | CGATCAGATTCAAAAAGTATCAACG  | TCTCGCTCTTGTTGATCTGC        |     |
| PZ149 | AT1G13440.1 | CGAAGAGAAGAAGAAACGAACC     | CGTCGCTGTTAACGATCCTTTC      |     |
| PZ151 | AT1G13440.1 | TTAAGAGAAAGCAAAAAGACAAAAGC | TCACTGATTCCATGCGCAGTC       | yes |
| PZ155 | AT5G15710.1 | AAAAGGACGAAGCTTGTTGC       | GAGTTGGAGCAAAGATTGCAAC      | yes |
| PZ157 | AT5G49520.1 | CGAGCAAGAACAAGAACAAGAAC    | TGACGTAAGTAGATTCGCCATG      |     |
| PZ159 | AT5G49520.1 | AGCTAGGTTTGCGTTTCTGAC      | TCCACCTATAACCGTCGTCAAG      | yes |
| FLC2  | AT5G10140.1 | AGAAATCAAGCGAATTGAGAACAA   | CGTTGCGACGTTTGGAGAA         | yes |
| FLC6  | AT5G10140.1 | AAGCCAGCGCTATCACTAACTTT    | TCGGCAGATTGAAAATGACATT      |     |
| FLC1  | AT5G10140.1 | ATTTAGCAACGAAAGTGAAAATAAGG | GCCACGTGTACCGCATGAC         |     |
| FLC7  | AT5G10140.1 | CATCTCTCCAGCCTGGTCAAG      | GGCTTAAGATCATCAGCATGCT      |     |
| FLC9  | AT5G10140.1 | CATCATGTGGGAGCAGAAGCT      | CGGAAGATTGTCGGAGATTTG       |     |
